# Supplementary material for: Engineering Archeal Surrogate Systems for the Development of Protein–Protein Interaction Inhibitors against Human RAD51
Source: PubMed Central journal article supplement (PMC5117717; doi:10.1016/j.jmb.2016.10.009), 2016-11-20
Supplement: mmc1.pdf [file mmc1.pdf]

## Supplementary material

Moschetti *et al.* Engineering archeal surrogate systems for the development of protein-protein interaction inhibitors against human RAD51

### Contents

|                                    |    |
|------------------------------------|----|
| Supplementary material .....       | 1  |
| Supplementary Table 1.....         | 2  |
| Supplementary Figure 1.....        | 4  |
| Supplementary Figure 2.....        | 5  |
| Supplementary Figure 3.....        | 6  |
| Supplementary Figure 4.....        | 7  |
| Supplementary Figure 5.....        | 8  |
| Supplementary Figure 6.....        | 9  |
| Supplementary Figure 7.....        | 10 |
| Sequences of all the proteins..... | 11 |

## Supplementary Table 1.

### Crystallographic data collection and refinement statistics

|                                         | HumRadA1                                       |                              |                                               |                                                |                                |                                     |                                                                          |
|-----------------------------------------|------------------------------------------------|------------------------------|-----------------------------------------------|------------------------------------------------|--------------------------------|-------------------------------------|--------------------------------------------------------------------------|
|                                         | +RadA-OP                                       | HumRadA2                     | HumRadA3                                      | HumRadA4                                       | HumRadA14                      | HumRadA22                           | HumRadA22F                                                               |
| PDB accession number                    | 5FOS                                           | 5LB2                         | 5LBI                                          | 5L8V                                           | 5LB4                           | 5KDD                                | 5J4L                                                                     |
| <b>Data collection:</b>                 |                                                |                              |                                               |                                                |                                |                                     |                                                                          |
| Beamline                                | DLS I03                                        | DLS I02                      | DLS I04                                       | DLS I03                                        | Soleil Proxima-1               | DLS I02                             | DLS I04-1                                                                |
| X-ray wavelength [Å]                    | 0.9700                                         | 0.9796                       | 0.9799                                        | 0.9700                                         | 0.97903                        | 0.9795                              | 0.9173                                                                   |
| <b>Data processing:</b>                 |                                                |                              |                                               |                                                |                                |                                     |                                                                          |
| Spacegroup                              | P 2 <sub>1</sub> 2 <sub>1</sub> 2 <sub>1</sub> | P 3 <sub>2</sub> 2 1         | P 2 <sub>1</sub>                              | P 2 <sub>1</sub> 2 <sub>1</sub> 2 <sub>1</sub> | P 2 <sub>1</sub>               | P 1                                 | P 2 <sub>1</sub> 2 <sub>1</sub> 2 <sub>1</sub>                           |
| Unit cell (a, b, c) [Å]                 | 40.79, 61.78, 87.22                            | 90.04, 90.04, 67.86          | 37.35, 77.98, 39.81                           | 37.61, 71.61, 74.84                            | 39.51, 37.81, 69.45            | 37.85, 42.58, 86.44                 | 40.48, 61.06, 87.91                                                      |
| ( $\alpha, \beta, \gamma$ ) [°]         | 90.0, 90.0, 90.0                               | 90.0, 90.0, 120.0            | 90.0, 117.5, 90.0                             | 90.0, 90.0, 90.0                               | 90.0, 92.4, 90.0               | 78.6, 85.5, 63.6                    | 90.0, 90.0, 90.0                                                         |
| Resolution limits [Å]                   | 50.0-1.35                                      | 50.0-2.10                    | 40.0-1.43                                     | 50.0-1.50                                      | 45.0-1.98                      | 84.7-1.99                           | 30.0-1.13                                                                |
| (High resolution shell) [Å]             | (1.43-1.35)*                                   | (2.23-2.10)*                 | (1.52-1.43)*                                  | (1.59-1.50)*                                   | (2.10-1.98)*                   | (1.994-1.988)*                      | (1.20-1.13)*                                                             |
| Number of molecules in ASU              | 1                                              | 1                            | 1                                             | 1                                              | 1                              | 2                                   | 1                                                                        |
| No of total/unique reflections          | 232321 / 47394                                 | 203161 / 18731               | 126928 / 36018                                | 232974 / 32967                                 | 50568 / 14305                  | 55356 / 31086                       | 454090 / 148188                                                          |
| Multiplicity                            | 4.9 (4.8)                                      | 10.9 (10.9)                  | 3.5 (3.0)                                     | 7.0 (7.0)                                      | 3.5 (3.3)                      | 1.8(1.8)                            | 3.1 (1.6)                                                                |
| R <sub>merge</sub>                      | 0.107 (0.586)                                  | 0.056 (0.394)                | 0.052 (0.257)                                 | 0.093 (0.544)                                  | 0.141 (0.700)                  | 0.130 (0.286)                       | n/a                                                                      |
| R <sub>meas</sub>                       | 0.043 (0.153)                                  | 0.051 (0.644)                | 0.045 (0.226)                                 | 0.063 (0.668)                                  | 0.088 (0.635)                  | 0.183 (0.405)                       | 0.051 (0.485)                                                            |
| I/ $\sigma$                             | 16.3 (2.7)                                     | 29.46 (4.20)                 | 20.51 (5.56)                                  | 20.40 (3.25)                                   | 10.67 (2.29)                   | 5.0 (2.1)                           | 14.8 (2.03)                                                              |
| CC ½                                    | n/a                                            | n/a                          | n/a                                           | n/a                                            | n/a                            | n/a                                 | 99.9 (75.2)                                                              |
| Completeness [%]                        | 96.3 (98.6)                                    | 99.7 (99.4)                  | 97.1 (91.4)                                   | 99.8 (99.2)                                    | 99.1 (98.0)                    | 95.2 (94.5)                         | 93.7 (67.5)                                                              |
| <b>Refinement:</b>                      |                                                |                              |                                               |                                                |                                |                                     |                                                                          |
| R <sub>work</sub> /R <sub>free</sub>    | 0.141 / 0.182                                  | 0.222/ 0.252                 | 0.164 / 0.193                                 | 0.164 / 0.193                                  | 0.229 / 0.260                  | 0.230 / 0.250                       | 0.123/ 0.145                                                             |
| No. of unique/free reflections          | 47391 / 2399                                   | 18731 / 964                  | 36017 / 1798                                  | 32966 / 1670                                   | 14304 / 705                    | 30909 / 1566                        | 78955 / 3954                                                             |
| R.m.s deviations:                       |                                                |                              |                                               |                                                |                                |                                     |                                                                          |
| bond lengths [Å]                        | 0.009                                          | 0.010                        | 0.010                                         | 0.010                                          | 0.010                          | 0.011                               | 0.009                                                                    |
| bond angles [°]                         | 1.30                                           | 1.11                         | 1.11                                          | 1.16                                           | 1.10                           | 1.20                                | 1.13                                                                     |
| Ramachandran analysis:                  |                                                |                              |                                               |                                                |                                |                                     |                                                                          |
| Favoured / Allowed/ Outliers            | 232 / 2 / 0                                    | 214 / 3 / 0                  | 212 / 2 / 0                                   | 215 / 3 / 0                                    | 198 / 6 / 1                    | 422 / 4 / 0                         | 222 / 0 / 0                                                              |
| Number of atoms:                        |                                                |                              |                                               |                                                |                                |                                     |                                                                          |
| Protein / Solvent / Hetero              | 1949 / 290 / 53                                | 1718 / 41 / 0                | 3443 / 270 / 271                              | 3472** / 240 / 245                             | 1702 / 44 / 44                 | 3428 / 239 / 259                    | 1933 / 298 / 1                                                           |
| Mean/ Wilson B-factor [Å <sup>2</sup> ] | 18.4 / 18.5                                    | 50.1 / 44.4                  | 18.0 / 14.9                                   | 20.3 / 17.2                                    | 38.4 / 29.7                    | 25.1 / 20.8                         | 15.2 / 9.2                                                               |
| Crystallisation condition:              | 8% PEG1000, 0.1 M Na/KPO <sub>4</sub> , pH 6.2 | 25% PEG6000, 0.1M MES pH 7.0 | 4-8% PEG1000, 0.1M Na/KPO <sub>4</sub> pH 5.6 | 12% PEG20000, 0.1 M MES pH 6.5                 | 25% PEG4000, 0.1 M Tris pH 8.5 | 20% PEG3350, 0.2M MgSO <sub>4</sub> | 20% PEG8000, 0.08 M Na Cacodylate pH 6.5, 0.16M Ca Acetate, 18% glycerol |
| Cryo-/soaking condition:                | 10 % glycerol                                  | 10% glycerol                 | 10% glycerol                                  |                                                |                                |                                     |                                                                          |

Supplementary table 1 (continued)

|                                        | HumRad26F                                      | HumRad28                                              | HumRadA33F                                                      | HumRadA22F<br>+FHTA peptide                                                                                 | HumRadA22F<br>+ fragment A5                                                                                                | HumRadA22F<br>+ fragment H7                                                                                                   |
|----------------------------------------|------------------------------------------------|-------------------------------------------------------|-----------------------------------------------------------------|-------------------------------------------------------------------------------------------------------------|----------------------------------------------------------------------------------------------------------------------------|-------------------------------------------------------------------------------------------------------------------------------|
| PDB accession number                   | 5JEE                                           | 5JED                                                  | 5JEC                                                            | 5JFG                                                                                                        | 5J4H                                                                                                                       | 5J4K                                                                                                                          |
| <b>Data collection:</b>                |                                                |                                                       |                                                                 |                                                                                                             |                                                                                                                            |                                                                                                                               |
| Beamline                               | DLS I24                                        | DLS I24                                               | ESRF ID23-1                                                     | DLS I04                                                                                                     | DLS I04                                                                                                                    | DLS I04                                                                                                                       |
| X-ray wavelength [Å]                   | 0.9686                                         | 0.9686                                                | 0.9763                                                          | 0.9794                                                                                                      | 0.9795                                                                                                                     | 0.9795                                                                                                                        |
| <b>Data processing:</b>                |                                                |                                                       |                                                                 |                                                                                                             |                                                                                                                            |                                                                                                                               |
| Spacegroup                             | P 2 <sub>1</sub> 2 <sub>1</sub> 2 <sub>1</sub> | P 2 <sub>1</sub>                                      | P 3 <sub>1</sub> 2                                              | P 2 <sub>1</sub> 2 <sub>1</sub> 2 <sub>1</sub>                                                              | P 2 <sub>1</sub> 2 <sub>1</sub> 2 <sub>1</sub>                                                                             | P 2 <sub>1</sub> 2 <sub>1</sub> 2 <sub>1</sub>                                                                                |
| Unit cell (a, b, c) [Å]                | 50.58, 50.60, 74.27                            | 37.77, 72.10, 41.93                                   | 90.75, 90.75, 102.51                                            | 40.52, 59.27, 88.14                                                                                         | 40.46, 61.12, 87.77                                                                                                        | 40.44, 61.21, 87.74                                                                                                           |
| ( $\alpha, \beta, \gamma$ ) [°]        | 90.0, 90.0, 90.0                               | 90.0, 115.9, 90.0                                     | 90.0, 90.0, 120.0                                               | 90.0, 90.0, 90.0                                                                                            | 90.0, 90.0, 90.0                                                                                                           | 90.0, 90.0, 90.0                                                                                                              |
| Resolution limits [Å]                  | 74.3-1.49                                      | 37.7-1.33                                             | 78.6-2.34                                                       | 59.3-1.77                                                                                                   | 61.1-1.37                                                                                                                  | 87.7-1.35                                                                                                                     |
| (High resolution shell) [Å]            | (1.492-1.487) *                                | (1.337-1.332) *                                       | (2.348-2.340) *                                                 | (1.775-1.769) *                                                                                             | (1.378-1.374) *                                                                                                            | (1.350-1.346) *                                                                                                               |
| Number of molecules in ASU             | 1                                              | 1                                                     | 2                                                               | 1                                                                                                           | 1                                                                                                                          | 1                                                                                                                             |
| No of total/unique reflections         | 211473 / 31823                                 | 214016 / 45801                                        | 225489 / 21095                                                  | 114496 / 21412                                                                                              | 238051 / 44591                                                                                                             | 293070 / 46330                                                                                                                |
| Multiplicity                           | 6.6 (4.5)                                      | 4.7 (3.2)                                             | 10.7 (10.6)                                                     | 5.3 (5.5)                                                                                                   | 5.3 (4.4)                                                                                                                  | 6.3 (5.3)                                                                                                                     |
| R <sub>merge</sub>                     | 0.063 (0.844)                                  | 0.093 (1.086)                                         | 0.193 (1.462)                                                   | 0.082 (0.841)                                                                                               | 0.056 (0.662)                                                                                                              | 0.045 (0.707)                                                                                                                 |
| R <sub>meas</sub>                      | 0.068 (0.958)                                  | 0.103 (1.304)                                         | 0.202 (1.537)                                                   | 0.091 (0.931)                                                                                               | 0.062 (0.755)                                                                                                              | 0.050 (0.785)                                                                                                                 |
| I/ $\sigma$ I                          | 17.5 (2.2)                                     | 7.6 (2.1)                                             | 9.9 (1.5)                                                       | 13.5 (2.2)                                                                                                  | 17.7 (2.0)                                                                                                                 | 24.9 (2.1)                                                                                                                    |
| CC ½                                   | n/a                                            | 0.992/0.575                                           | 0.997(0.652)                                                    | 0.998 (0.744)                                                                                               | 0.999 (0.650)                                                                                                              | 1.000 (0.733)                                                                                                                 |
| Completeness [%]                       | 99.3 (87.6)                                    | 99.3 (99.1)                                           | 100.0 (100.0)                                                   | 100.0 (100.0)                                                                                               | 96.5 (76.7)                                                                                                                | 94.4 (58.5)                                                                                                                   |
| <b>Refinement:</b>                     |                                                |                                                       |                                                                 |                                                                                                             |                                                                                                                            |                                                                                                                               |
| R <sub>work</sub> /R <sub>free</sub>   | 0.194/ 0.218                                   | 0.135/ 0.171                                          | 0.199/ 0.239                                                    | 0.174/ 0.192                                                                                                | 0.132/ 0.170                                                                                                               | 0.129/ 0.164                                                                                                                  |
| No. of unique/free reflections         | 31579/ 1617                                    | 43497/ 2263                                           | 21043/ 1079                                                     | 21337/ 1080                                                                                                 | 44537/ 2241                                                                                                                | 46275/ 2322                                                                                                                   |
| R.m.s deviations:                      |                                                |                                                       |                                                                 |                                                                                                             |                                                                                                                            |                                                                                                                               |
| bond lengths [Å]                       | 0.010                                          | 0.012                                                 | 0.010                                                           | 0.011                                                                                                       | 0.004                                                                                                                      | 0.008                                                                                                                         |
| bond angles [°]                        | 1.26                                           | 1.58                                                  | 1.20                                                            | 1.10                                                                                                        | 0.87                                                                                                                       | 1.12                                                                                                                          |
| Ramachandran analysis:                 |                                                |                                                       |                                                                 |                                                                                                             |                                                                                                                            |                                                                                                                               |
| Favoured / Allowed / Outliers          | 206 / 5 / 1                                    | 227 / 1 / 0                                           | 445 / 5 / 0                                                     | 219 / 1 / 0                                                                                                 | 221 / 0 / 0                                                                                                                | 221 / 0 / 0                                                                                                                   |
| Number of atoms:                       |                                                |                                                       |                                                                 |                                                                                                             |                                                                                                                            |                                                                                                                               |
| Protein / Solvent / Hetero             | 1746 / 87 / 88                                 | 1923 / 201 / 22                                       | 3478 / 89 / 12                                                  | 3638** / 141 / 209                                                                                          | 3822** / 276 / 13                                                                                                          | 3711** / 241 / 30                                                                                                             |
| Mean/Wilson B-factor [Å <sup>2</sup> ] | 33.5 / 22.5                                    | 21.2 / 15.5                                           | 39.8 / 45.6                                                     | 28.9 / 23.9                                                                                                 | 18.3 / 12.0                                                                                                                | 19.9 / 13.1                                                                                                                   |
| Crystallisation condition:             |                                                |                                                       |                                                                 |                                                                                                             |                                                                                                                            |                                                                                                                               |
|                                        | 15% PEG2000,<br>0.1M Na Acetate pH<br>4.6      | 40% MPD, 5%<br>PEG8000, 0.1 M Na<br>Cacodylate pH 6.5 | 22% PEG3350,<br>0.1 M BisTris pH5.0,<br>0.2 M LiSO <sub>4</sub> | 18% PEG8000, 0.08 M<br>Na Cacodylate pH 6.5,<br>0.16 M Ca Acetate<br>20% glycerol<br>5 mM FHTA, 10%<br>DMSO | 18% PEG8000, 0.08 M<br>Na Cacodylate pH 6.5,<br>0.16M CaAcetate<br>20% glycerol<br>4 x 5 mM ligand<br>(cocktail), 10% DMSO | 18% PEG8000, 0.08 M<br>Na Cacodylate pH 6.5,<br>0.16 M Ca Acetate,<br>20% glycerol<br>4 x 5 mM ligand<br>(cocktail), 10% DMSO |
| Cryo-/soaking                          |                                                |                                                       |                                                                 |                                                                                                             |                                                                                                                            |                                                                                                                               |

\* values in parenthesis are for the highest resolution shell, as indicated

\*\* these values include riding hydrogen atoms . n/a not available

## Supplementary Figure 1

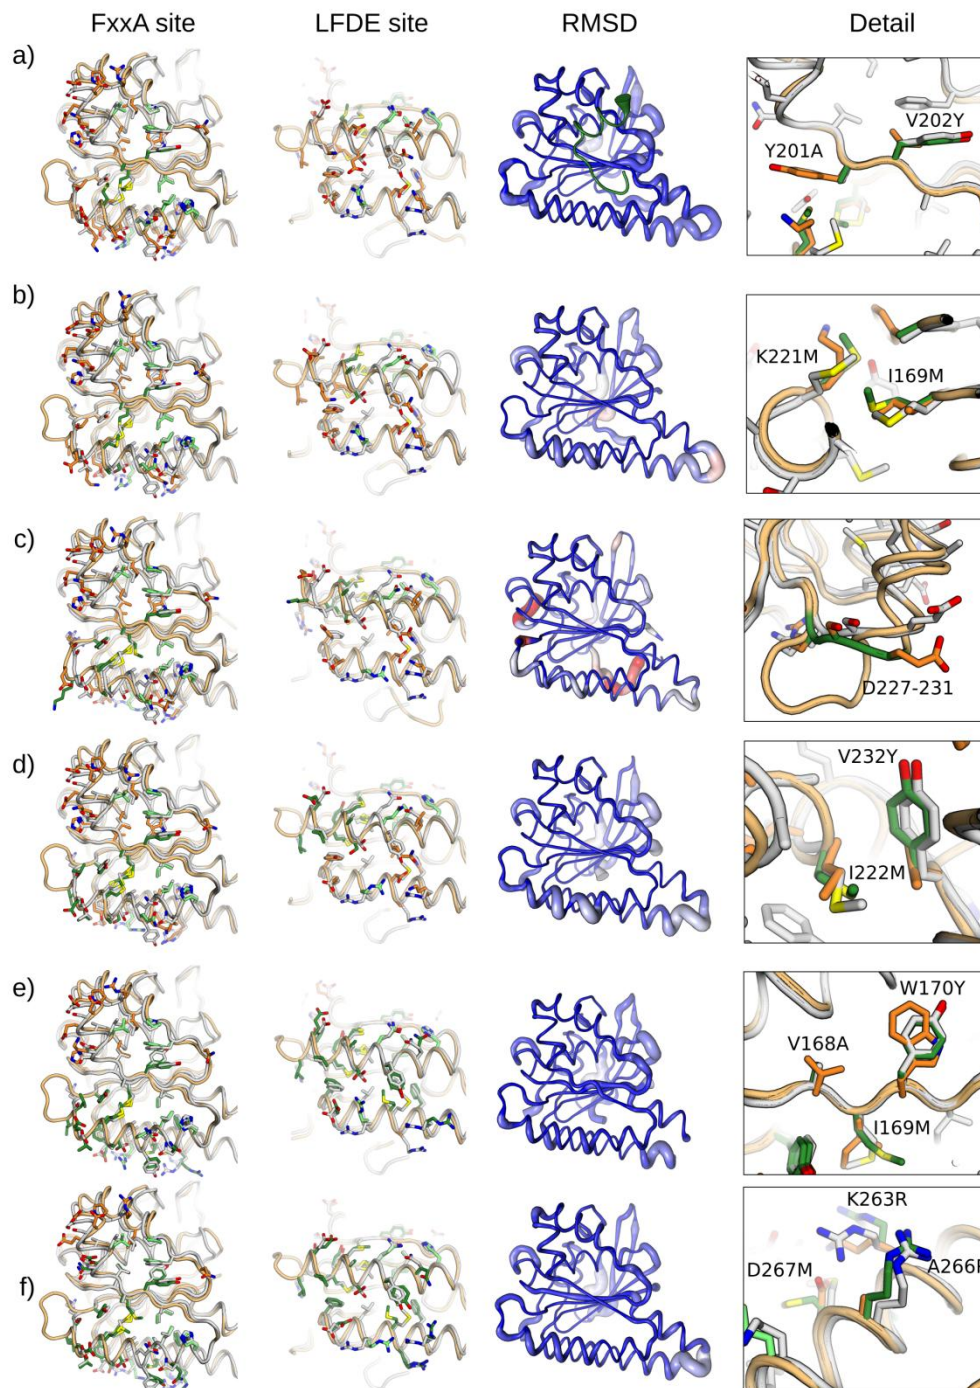

**Structures of HumRadA mutants.** In all the panels the two left-most figures show an overlay of the HumRadA mutant (brown backbone) and human RAD51 (white backbone and white carbon atoms). HumRadA residues are coloured with brown if different from RAD51, pale green if naturally identical and with dark green if humanised to RAD51-like. The third panel shows the superpositioning of the HumRadA mutant with human RAD51 with the RMSD between the structures shown as the thickness of the ribbon. The right-most panel shows a detail of a humanising mutation introduced in that particular mutant. (a) HumRadA1, (b) HumRadA2, (c) HumRadA3, (d) HumRadA4, (e) HumRadA14 and (f) HumRadA22

## Supplementary Figure 2.

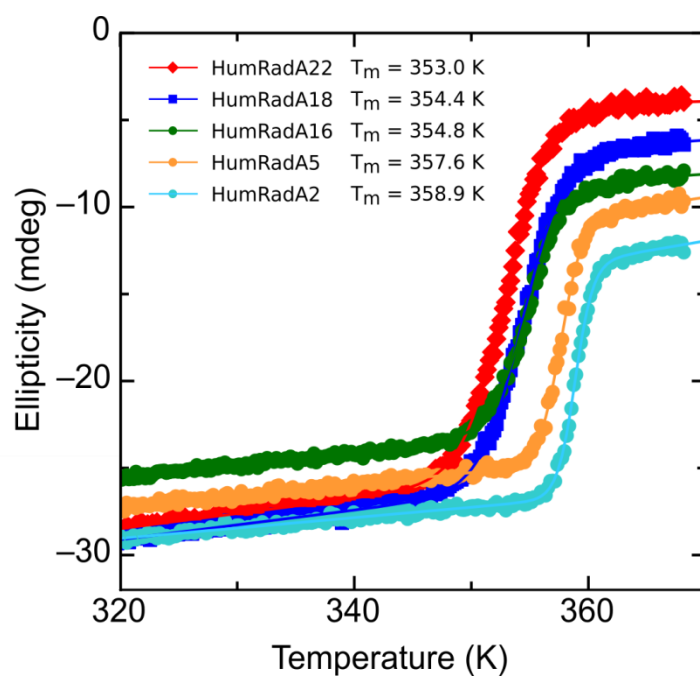

**Thermal stability of HumRadA mutants.** Analyses of the thermal stability of the HumRadA mutants, as labelled in the graph, using CD spectroscopy and following the change of molar ellipticity at 222 nm.

## Supplementary Figure 3.

Progression in humanisation of P<sub>HRadA</sub> (mutants in the cell)

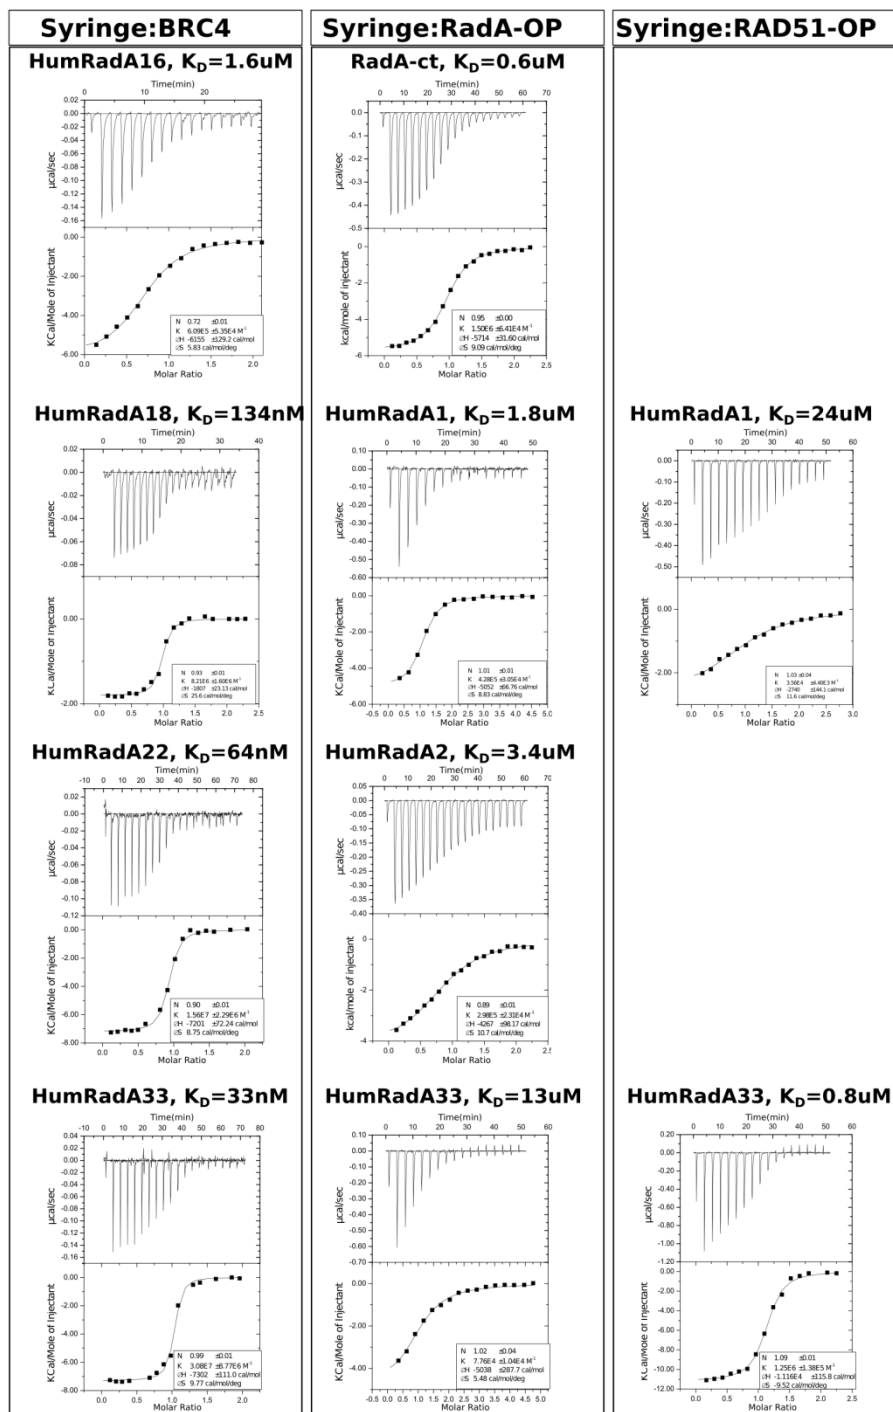

**ITC measurements of peptide binding to HumRadA mutants.** In each graph the top panel shows the baseline corrected raw data from the titration and the bottom graph shows the integrated heats of binding for each injection of the peptide (black squares) and the solid line the fit into single binding site mode model. The first column shows the data for titration of BRC4 peptide into different mutants, as labelled in the figure. The middle columns shows the binding to RadA oligomerisation peptide (RadA-OP) to different mutants and the right panel showing the binding data for RAD51 oligomerisation peptide (RAD51-OP).

## Supplementary Figure 4.

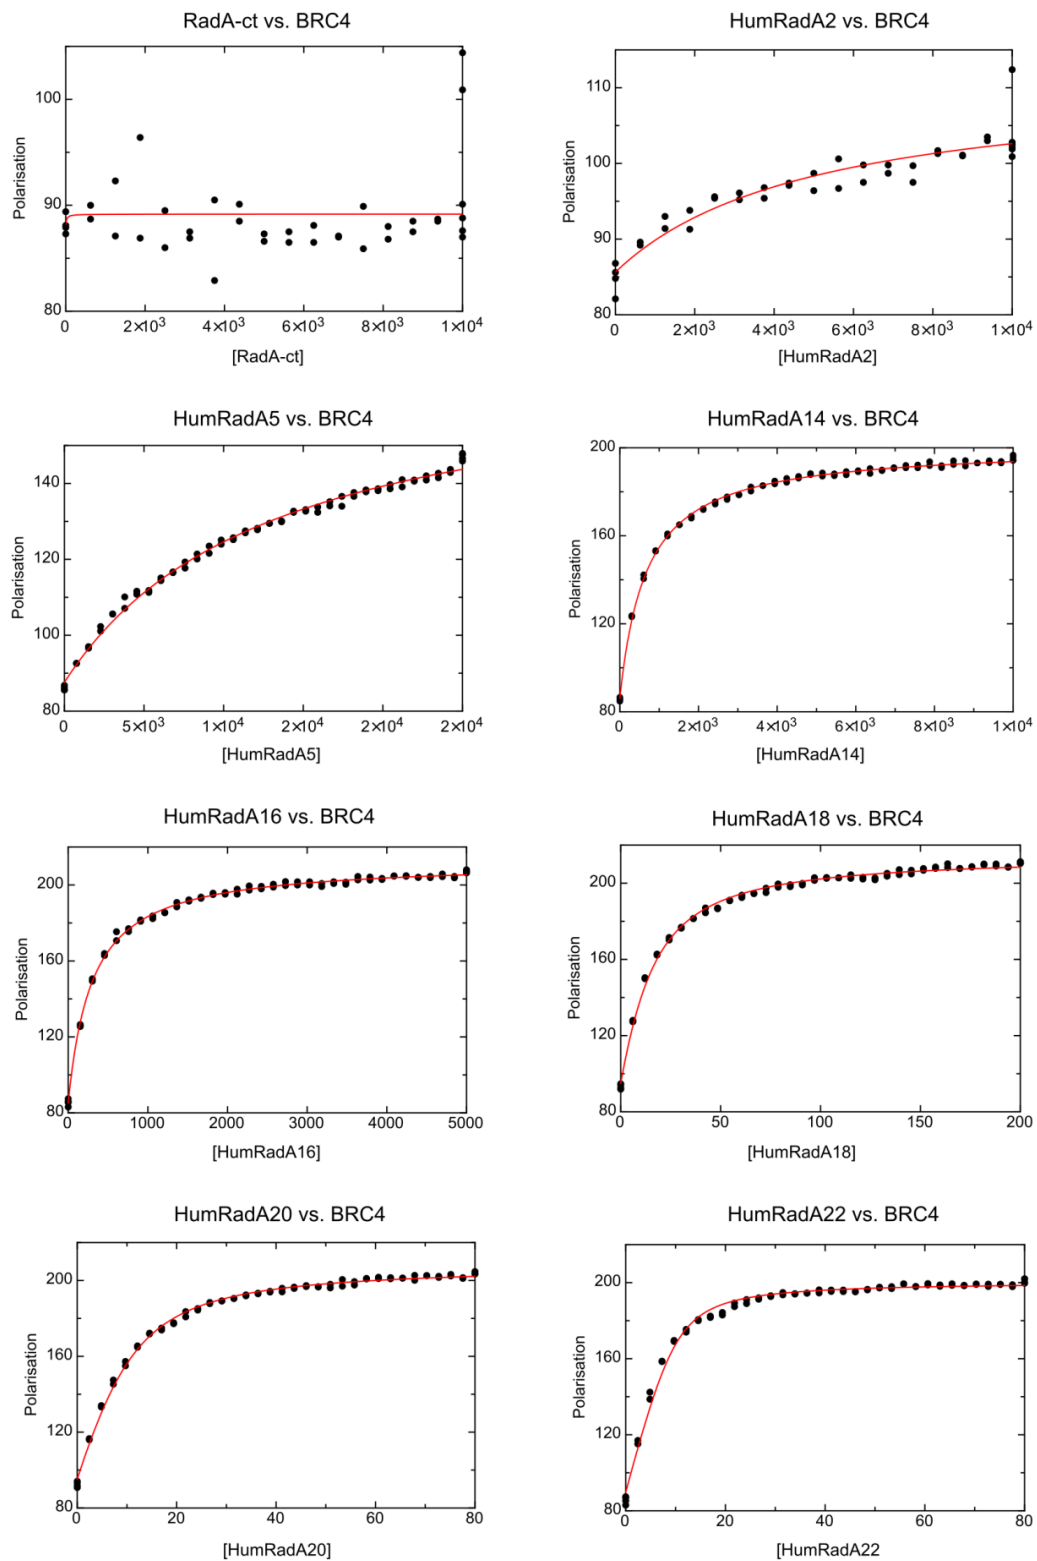

**FP binding data for BRC4 peptide interaction with HumRadA mutants.** Each graph represents titration of the indicated HumRadA mutant into Alexa Fluor 488-labelled BRC4 peptide, as described in Materials and Methods. All affinities are listed in Table 1 of the main article.

## Supplementary Figure 5.

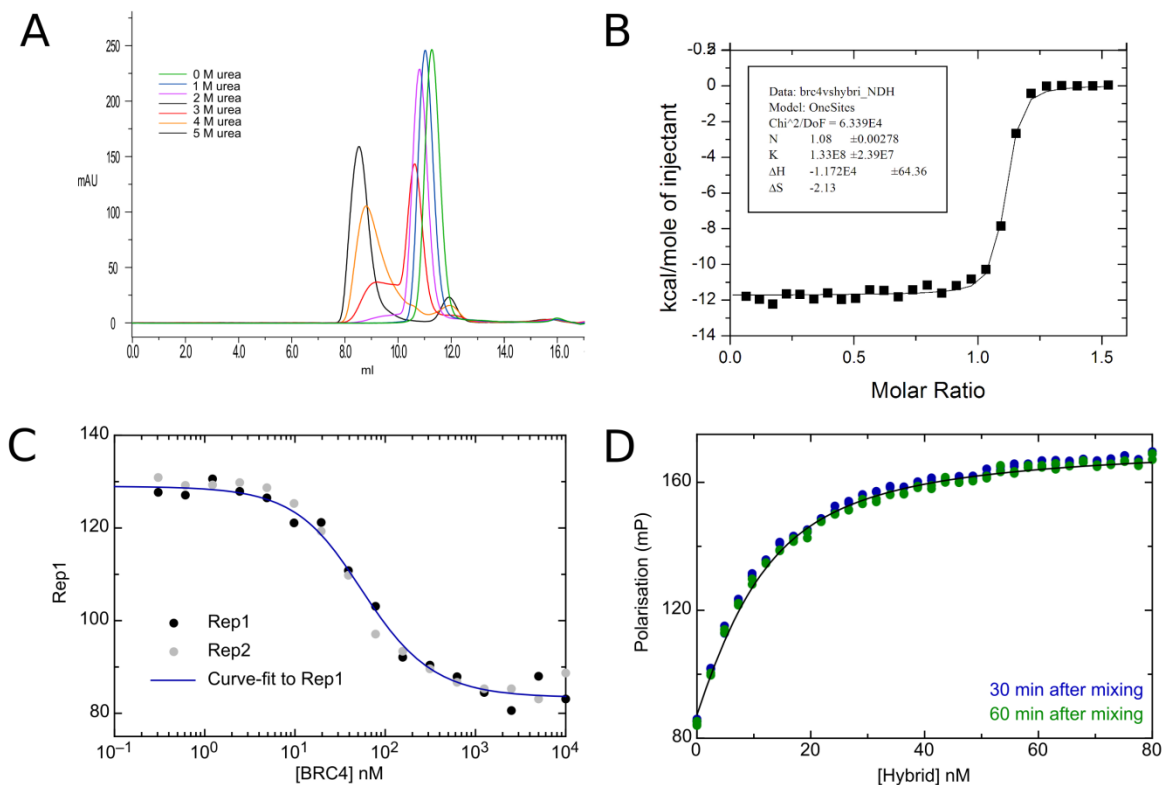

**Analyses of ChimRAD51 and development of displacement FP assay.** (A) Size exclusion chromatography of TEV-cleaved BRC4-RAD51 complex in increasing urea concentration in the running buffer, as indicated in the figure. Only at 5 M urea, when RAD51 denatures (as shown by elution close to void volume due to large hydrodynamic radius of the main peak), do the BRC4 peptide and RAD51 separate. (B) ITC titration of BRC4 peptide into ChimRAD51, showing a  $K_d$  of 6 nM (C) Competition FP assay in 384-well format using unlabelled BRC4 to compete Alexa Fluor 488-labelled BRC4 tracer, showing suitability of the assay to be miniaturised. (D) Stability ChimRAD51 in BRC4 binding assay is demonstrated by two FP titrations measured at 30 (blue) and 60 (green) minutes after peptide and protein were mixed.



## Supplementary Figure 6.

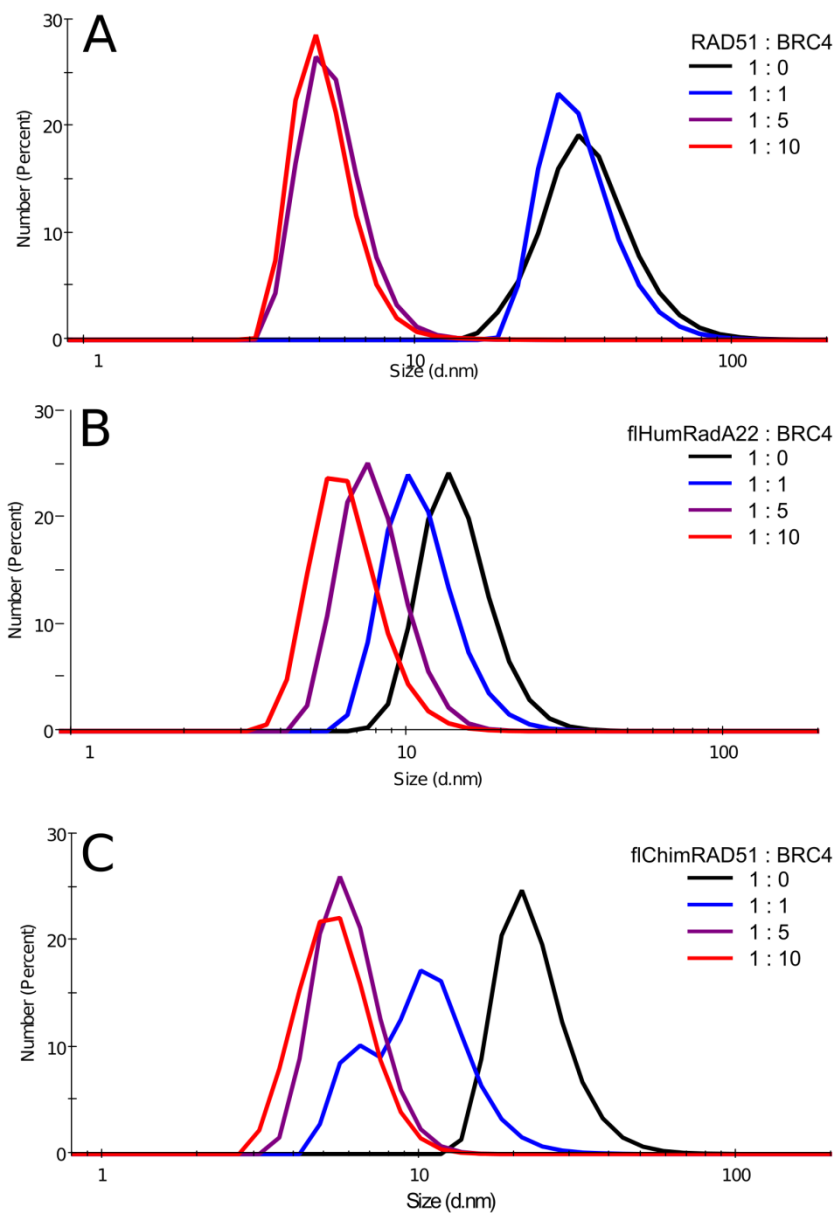

**Dynamic light scattering analyses of full-length RAD51 and its surrogate forms.** (A) Size distribution (expressed as a percentage of total particles in the sample) of purified human RAD51 protein alone (black line, average hydrodynamic radius: 32.7nm) or in the presence of increasing concentration of BRC4 peptide (blue, purple and red lines), as indicated in the graph as a stoichiometric ratio. (B) Similar data as in A, but using full-length HumRadA22 (average hydrodynamic radius 13.5 nm) (C) Like A, but using full-length ChimRAD51 (average hydrodynamic radius 21.0 nm).

## Supplementary Figure 7.

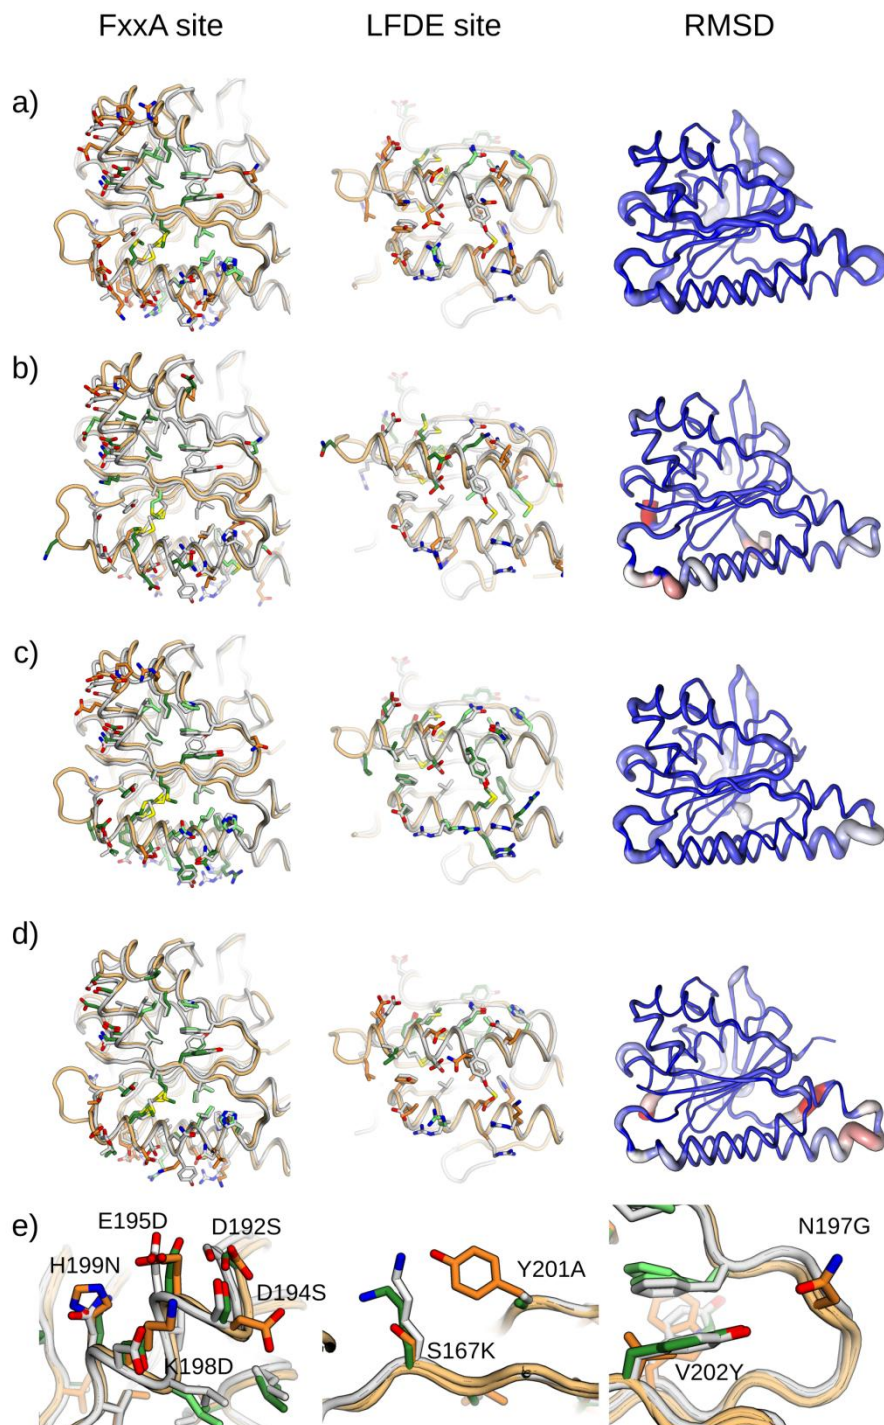

**Comparison of the crystallographic surrogates with RadA and human RAD51.** The two left-most figures in panels (a-d) show an overlay of the HumRadA mutant (brown backbone) and human RAD51 (white backbone and white carbon atoms). HumRadA residues are coloured with brown if different from RAD51, pale green if naturally identical and with dark green if humanised to RAD51-like. The third panel shows superpositioning of the HumRadA with human RAD51 with RMSD between the structures shown as thickness of the ribbon. (a) HumRadA22F, (b) HumRadA26F, (c) HumRadA28F, (d) HumRadA33F. (e) Details of extended humanisation mutations introduced into the FxxA site and oligomerisation groove of HumRadA33F (and HumRadA33), coloured as in (a-d)

## Sequences of all the proteins

FASTA formatted amino acid sequences of all the proteins described in this paper, including wild type *P. furiosus* RadA and human RAD51.

>PfRadA-ct

MATIGRISTGSKSLDKLLGGGIETQAI TEVFGFEGSGKTQLAHTLAVMVQLPPEEGGLNG  
SVIWIWIDTENTFRPERIREIAQNRGLDPDEV LKHIYVARAFNSNHQMLLVQQAEDKIKELL  
NTDRPVKLLIVDSLTS HFRSEYIGRGALAERQQKLAKHLADLHRLANLYDIAVFVTNQVQ  
ANGGHILAHSATLRVYLRKKGKGGKRIARLIDAPHLPEGEAVFSITEKGI ED

>HumRadA1

MATIGRISTGSKSLDKLLGGGIETQAI TEVFGFEGSGKTQLAHTLAVMVQLPPEEGGLNG  
SVMWIDTENTFRPERIREIAQNRGLDPDEV LKHIAYARAFNSNHQMLLVQQAEDMIKELL  
NTDRPVKLLIVDSLTS HFRSEYIGRGALAERQQKLAKHLADLHRLANLYDIAVFVTNQVQ  
ANGGHILAHSATLRVYLRKKGKGGKRIARLIDAPHLPEGEAVFSITEKGI ED

>HumRadA2

MATIGRISTGSKSLDKLLGGGIETQAI TEVFGFEGSGKTQLAHTLAVMVQLPPEEGGLNG  
SVMWIDTENTFRPERIREIAQNRGLDPDEV LKHIAYARAFNSNHQMLLVQQAASAMIKELL  
NTDRPVKLLIVDSLTS HFRSEYIGRGALAERQQKLAKHLADLHRLANLYDIAVFVTNQVQ  
ANGGHILAHSATLRVYLRKKGKGGKRIARLIDAPHLPEGEAVFSITEKGI ED

>HumRadA3

MATIGRISTGSKSLDKLLGGGIETQAI TEVFGFEGSGKTQLAHTLAVMVQLPPEEGGLNG  
SVMWIDTENTFRPERIREIAQNRGLDPDEV LKHIAYARAFNSNHQMLLVQQAASAMMVELL  
NTDRPYKLLIVDSLTS HFRSEYIGRGALAERQQKLAKHLADLHRLANLYDIAVFVTNQVQ  
ANGGHILAHSATLRVYLRKKGKGGKRIARLIDAPHLPEGEAVFSITEKGI ED

>HumRadA4

MATIGRISTGSKSLDKLLGGGIETQAI TEVFGFEGSGKTQLAHTLAVMVQLPPEEGGLNG  
SVMWIDTENTFRPERIREIAQNRGLDPDEV LKHIAYARAFNSNHQMLLVQQAASAMMKESR  
YALLIVDSLTS HFRSEYIGRGALAERQQKLAKHLADLHRLANLYDIAVFVTNQVQANGGH  
ILAHSATLRVYLRKKGKGGKRIARLIDAPHLPEGEAVFSITEKGI ED

>HumRadA5

MATIGRISTGSKSLDKLLGGGIETQAI TEVFGFEGSGKTQLAHTLAVMVQLPPEEGGLNG  
SVMWIDTENTFRPERIREIAQNRGLDPDEV LKHIAYARAFNSNHQMQLLYQASAMIKELL  
NTDRPVKLLIVDSLTS HFRSEYIGRGALAERQQKLAKHLAMLHRLANEFDIAVFVTNQVQ  
ANGGHILAHSATLRVYLRKKGKGGKRIARLIDAPHLPEGEAVFSITEKGI ED

>HumRadA14

MATIGRISTGSKSLDKLLGGGIETQAI TEVFGFEGSGKTQLAHTLAVMVQLPPEEGGLNG  
SAMYIDTENTFRPERIREIAQNRGLDPDEV LKHIAYARAFNSNHQMQLLYQASAMMVESL  
NTDRPYKLLIVDSLTS HFRSEYIGRGALAERQQKLARFLAMLHRLANEFDIAVFVTNQVQ  
ANGGHILAHSATLRVYLRKKGKGGKRIARLIDAPHLPEGEAVFSITEKGI ED

>HumRadA16

MATIGRISTGSKSLDKLLGGGIETQAI TEVFGFEGSGKTQLAHTLAVMVQLPPEEGGLNG  
SAMYIDTENTFRPERIREIAQNRGLDPDEV LKHIAYARAFNSNHQMQLLYQASAMMVELL  
NTDRPYKLLIVDSLTS HFRSEYIGRGALAERQQKLARFLRMLHRLANEFDIAVFVTNQVQ  
ANGGHILAHSATLRVYLRKKGKGGKRIARLIDAPHLPEGEAVFSITEKGI ED

>HumRadA18

MATIGRISTGSKSLDKLLGGGIETQAI TEVFGFEGSGKTQLAHTLAVMVQLPPEEGGLNG  
SAMYIDTENTFRPERIREIAQNRGLDPDEV LDNVAYARAFNSNHQMQLLYQASAMMVESL  
NTDRPYKLLIVDSLTS HFRSEYIGRGALAERQQKLARFLAMLHRLANEFDIAVFVTNQVQ  
ANGGHILAHSATLRVYLRKKGKGGKRIARLIDAPHLPEGEAVFSITEKGI ED

>HumRadA20

MATIGRISTGSKSLDKLLGGGIETQAI TEVFGFEGSGKTQLAHTLAVMVQLPPEEGGLNG  
SAMYIDTENTFRPERIREIAQNRGLDPDEVLDNVAYARAFNSNHQMQLLYQASAMMVESL  
NTDRPYKLLIVDSLTSHFSEYIGRGALAERQQKLARFLRMLHRLANEFDIAVFVTNQVQ  
ANGGHILAHSATLRVYLRKGGKGGKRIARLIDAPHLPEGEAVFSITEKGIED

>HumRadA22

MATIGRISTGSKSLDKLLGGGIETQAI TEVFGFEGSGKTQLAHTLAVMVQLPPEEGGLNG  
SAMYIDTENTFRPERLREIAQNRGLDPDEVLDNVAYARAFNSNHQMQLLYQASAMMVESL  
NTDRPYKLLIVDSLTSHFSEYIGRGALAERQQKLARFLRMLHRLANEFDIAVFVTNQVQ  
ANGGHILAHSATLRVYLRKGGKGGKRIARLIDAPHLPEGEAVFSITEKGIED

>HumRadA33

MATIGRISTGSKSLDKLLGGGIETQAI TEVFGFEGSGKTQLAHTLAVMVQLPPEEGGLNG  
KAMYIDTEGTFRPERLLEIAQNRGLSGSDVLDNVAYARAFNSNHQMQLLYQASAMMVESL  
NTDRPYKLLIVDSLTSHFSEYIGRGALAERQQKLARFLRMLHRLANEFDIAVFVTNQVQ  
ANGGHILAHSATLRVYLRKGGKGGKRIARLIDAPHLPEGEAVFSITEKGIED

>HumRadA22F

MATIGRISTGSKSLDKLLGGGIETQAI TEVFGFEGSGKTQLAHTLAVMVQLPPEEGGLNG  
SAMYIDTENTFRPERLREIAQNRGLDPDEVLDNVAYARAFNSNHQMQLLYQQAEDMIKELL  
NTDRPVKLLIVDSLTSHFSEYIGRGALAERQQKLAKHLADLHRLANLYDIAVFVTNQVQ  
ANGGHILAHSATLRVYLRKGGKGGKRIARLIDAPHLPEGEAVFSITEKGIED

>HumRadA26F

MATIGRISTGSKSLDKLLGGGIETQAI TEVFGFEGSGKTQLAHTLAVMVQLPPEEGGLNG  
KAMYIDTENTFRPERLLEIAQNRGLDPDEVLDNVAYARAFNSNHQMQLLYQQAEDMMKELL  
NTDRPVKLLIVDSLTSHFSEYIGRGALAERQQKLAKHLADLHRLANLYDIAVFVTNQVQ  
ANGGHILAHSATLRVYLRKGGKGGKRIARLIDAPHLPEGEAVFSITEKGIED

>HumRadA28F

MATIGRISTGSKSLDKLLGGGIETQAI TEVFGFEGSGKTQLAHTLAVMVQLPPEEGGLNG  
KAMYIDTENTFRPERLREIAQNRGLDPDEVLDNVAYARAFNSNHQMQLLYQASDMMVESL  
NTDRPYKLLIVDSLTSHFSEYIGRGALAERQQKLARFLRMLHRLANEFDIAVFVTNQVQ  
ANGGHILAHSATLRVYLRKGGKGGKRIARLIDAPHLPEGEAVFSITEKGIED

>HumRadA33F

MATIGRISTGSKSLDKLLGGGIETQAI TEVFGFEGSGKTQLAHTLAVMVQLPPEEGGLNG  
KAMYIDTEGTFRPERLLEIAQNRGLSGSDVLDNVAYARAFNSNHQMQLLYQQAEDMMVELL  
NTDRPYKLLIVDSLTSHFSEYIGRGALAERQQKLAKHLADLHRLANLYDIAVFVTNQVQ  
ANGGHILAHSATLRVYLRKGGKGGKRIARLIDAPHLPEGEAVFSITEKGIED

>flChimRAD51

MAMQMQLLEANADTSVEEESFGPQPI SRLEQCGINANDVKKLEEAGFHTVEAVAYAPKKE  
L INIKGISEAKADKILAEAAKLVPMGFTTATEFHQRRATIGRISTGSKSLDKLLGGGIETQ  
AI TEVFGFEGSGKTQLAHTLAVMVQLPPEEGGLNGKAMYIDTEGTFRPERLLAVAERYGL  
SGSDVLDNVAYARAFNTDHQTQLLYQASAMMVESRYALLIVDSATALYRTDYSGRGELSA  
RQMHLARFLRMLLRLADEFGVAVFVTNQVQARPD AFFGDPTRPIGGHILAHSATLRVYLR  
KGGKGGKRIARLIDAPHLPEGEAVFSITEKGIED

>ChimRAD51

MATIGRISTGSKSLDKLLGGGIETQAI TEVFGFEGSGKTQLAHTLAVMVQLPPEEGGLNG  
KAMYIDTEGTFRPERLLAVAERYGLSGSDVLDNVAYARAFNTDHQTQLLYQASAMMVESR  
YALLIVDSATALYRTDYSGRGELSARQMHLARFLRMLLRLADEFGVAVFVTNQVQARPD  
AFFGDPTRPIGGHILAHSATLRVYLRKGGKGGKRIARLIDAPHLPEGEAVFSITEKGIED

>flHumRadA22

MAGEEVKEIDEFEEELGFEPATEETPKKKKKEKIIRSIEDLPGVGPATAEKLREAGYDTLE  
AIAVASPIELKEVAGISEGTALKIIQAARKAANLGTFMRADEYLLKKRATIGRISTGSKSL  
DKLLGGGIETQAITEVFGEFGSGKTQLAHTLAVMVQLPPEEGGLNGSAMYIDTENTFRPE  
RLREIAQNRLDPDEVLDNVAYARAFNSNHQMQLLYQASAMMVESLNTDRPYKLLIVDSL  
TSHFRSEYIGRGALAERQQKLARFLRMLHRLANEFDIAVFVTNQVQARPD AFFGDPTRPI  
GGHILAHSATLRVYLRKKGKGGKRIARLIDAPHLPEGEAVFSITEKGIED

>HsRAD51 (wild type human RAD51)

MAMQMQLLEANADTSVEEESFGPQPISRLEQCGINANDVKKLEEAGFHTVEAVAYAPKKEL  
INIKGISEAKADKILAEAAKLVPMGFTTATEFHQRSEIIQITTGSKELDKLLQGGIETG  
SITEMFGEFRTGKTQICHTLAVTCQLPIDRGGGEGKAMYIDTEGTFRPERLLAVAERYGL  
SGSDVLDNVAYARAFNTDHQTQLLYQASAMMVESRYALLIVDSATALYRTDYSGRGELSA  
RQMHLARFLRMLLRLADEFGVAVVITNQVVAQVDGAAMFAADPKKPIGGNIIAHASTTRL  
YLRKGRGETRICKIYDSPCLPEAEAMFAINADGVGDAKD

>PfRadA (wild type *Pyrococcus furiosus* RadA)

MAGEEVKEIDEFEEELGFEPATEETPKKKKKEKIIRSIEDLPGVGPATAEKLREAGYDTLE  
AIAVASPIELKEVAGISEGTALKIIQAARKAANLGTFMRADEYLLKKRATIGRISTGSKSL  
DKLLGGGIETQAITEVFGEFGSGKTQLAHTLAVMVQLPPEEGGLNGSVIWIWIDTENTFRPE  
RIREIAQNRLDPDEVLKHIIYVARAFNSNHQMQLLVQQAEDKIKELLNTDRPVKLLIVDSL  
TSHFRSEYIGRGALAERQQKLAKHLADLHRLANLYDIAVFVTNQVQARPD AFFGDPTRPI  
GGHILAHSATLRVYLRKKGKGGKRIARLIDAPHLPEGEAVFSITEKGIED
